# Supplementary material
Source: PubMed Central journal article supplement (PMC3050082)
Supplement: NIHMS250729-supplement-1_si_001.pdf [file NIHMS250729-supplement-1_si_001.pdf]

## Supporting Information

# Design, Synthesis, and Evaluation of Diarylpyridines and Diarylanilines as Potent Non-nucleoside HIV-1 Reverse Transcriptase Inhibitors

Xingtao Tian<sup>a</sup>, Bingjie Qin<sup>a</sup>, Zhiyuan Wu<sup>a</sup>, Xiaofeng Wang<sup>a</sup>, Hong Lu<sup>b</sup>, Susan L. Morris-Natschke<sup>d</sup>, Chin Ho Chen<sup>c</sup>, Shibo Jiang<sup>b</sup>, Kuo-Hsiung Lee<sup>d,e</sup>, and Lan Xie<sup>a\*</sup>

<sup>a</sup>*Beijing Institute of Pharmacology & Toxicology, 27 Tai-Ping Road, Beijing 100850,  
China*

<sup>b</sup>*Lindsley F. Kimball Research Institute, New York Blood Center, New York, New York  
10065*

<sup>c</sup>*Duke University Medical Center, Box 2926, Surgical Oncology Research Facility,  
Durham, North Carolina 27710*

<sup>d</sup>*Natural Products Research Laboratories, Eshelman School of Pharmacy, University  
of North Carolina, Chapel Hill, North Carolina 27599-7568*

<sup>e</sup>*Chinese Medicine Research and Development Center, China Medical University and  
Hospital, Taichung, Taiwan*

## Contents

1. HPLC Conditions
2. Tables for HPLC data of final compounds

**HPLC conditions:**

HPLC analyses for purity were performed using an Agilent TC-C18 column (4.6 × 250 mm, 5 μm) eluting with a mixture of solvents A and B (Condition 1: acetonitrile/water with 0.1% formic acid 80:20, flow rate 1.2 mL/min; Condition 2: methanol/water with 0.1% formic acid 80:20, flow rate 1.0 mL/min), detected under UV wavelength at 254 nm and an injection volume of 3 μL.

**Table 1.** Summary of HPLC purity data for target compounds

| compounds  | condition-1          |          | condition-2          |          |
|------------|----------------------|----------|----------------------|----------|
|            | Retention time (min) | Purity % | Retention time (min) | Purity % |
| <b>11a</b> | 5.75                 | 98.63    | 9.00                 | 98.61    |
| <b>11b</b> | 6.36                 | 97.24    | 11.78                | 95.44    |
| <b>11c</b> | 1.33                 | 95.22    | 5.67                 | 99.04    |
| <b>11d</b> | 3.93                 | 98.25    | 7.36                 | 96.13    |
| <b>11e</b> | 7.72                 | 96.95    | 16.48                | 96.90    |
| <b>11f</b> | 4.81                 | 96.63    | 5.01                 | 96.87    |
| <b>11g</b> | 6.85                 | 97.90    | 11.91                | 99.18    |
| <b>11i</b> | 2.63                 | 97.39    | 4.73                 | 98.97    |
| <b>11j</b> | 3.05                 | 98.73    | 5.93                 | 99.32    |
| <b>11k</b> | 3.77                 | 97.99    | 5.74                 | 96.04    |
| <b>11m</b> | 3.78                 | 98.08    | 5.63                 | 98.67    |
| <b>12c</b> | 7.41                 | 95.40    | 8.66                 | 96.97    |
| <b>12d</b> | 5.41                 | 99.47    | 6.84                 | 100.00   |
| <b>12e</b> | 6.23                 | 97.15    | 6.25                 | 96.98    |
| <b>13a</b> | 10.36                | 95.72    | 7.56                 | 95.94    |
| <b>13b</b> | 4.09                 | 97.36    | 7.00                 | 97.09    |
| <b>13c</b> | 3.84                 | 97.40    | 5.30                 | 99.18    |
| <b>13d</b> | 2.70                 | 97.16    | 3.68                 | 97.62    |
| <b>13e</b> | 4.23                 | 96.99    | 7.71                 | 98.55    |
| <b>13f</b> | 3.11                 | 98.03    | 4.65                 | 98.81    |
| <b>13i</b> | 3.54                 | 99.44    | 4.46                 | 98.95    |
| <b>13j</b> | 4.77                 | 99.48    | 6.17                 | 97.92    |
| <b>13k</b> | 4.48                 | 97.35    | 6.56                 | 97.82    |
| <b>13m</b> | 2.77                 | 98.44    | 3.87                 | 99.16    |
| <b>14c</b> | 6.11                 | 97.94    | 4.93                 | 98.13    |
| <b>14d</b> | 4.25                 | 98.21    | 3.89                 | 98.79    |
| <b>14e</b> | 4.33                 | 100.0    | 4.15                 | 97.08    |
| <b>14f</b> | 4.02                 | 97.10    | 5.04                 | 97.23    |
| <b>15</b>  | 5.95                 | 99.60    | 7.58                 | 97.96    |

---

|           |      |        |      |       |
|-----------|------|--------|------|-------|
| <b>16</b> | 4.29 | 97.53  | 5.72 | 99.60 |
| <b>17</b> | 5.45 | 97.28  | 6.31 | 97.44 |
| <b>18</b> | 6.57 | 96.45  | 7.66 | 100.0 |
| <b>19</b> | 4.82 | 98.87  | 5.74 | 98.77 |
| <b>20</b> | 5.55 | 100.00 | 7.45 | 99.79 |

---
